# Supplementary material for: Efficient Decellularization by Application of Moderate High Hydrostatic Pressure with Supercooling Pretreatment
Source: MDPI journal article supplement (doi:10.3390/mi12121486), 2021-11-30
Supplement: s1 [file s1]

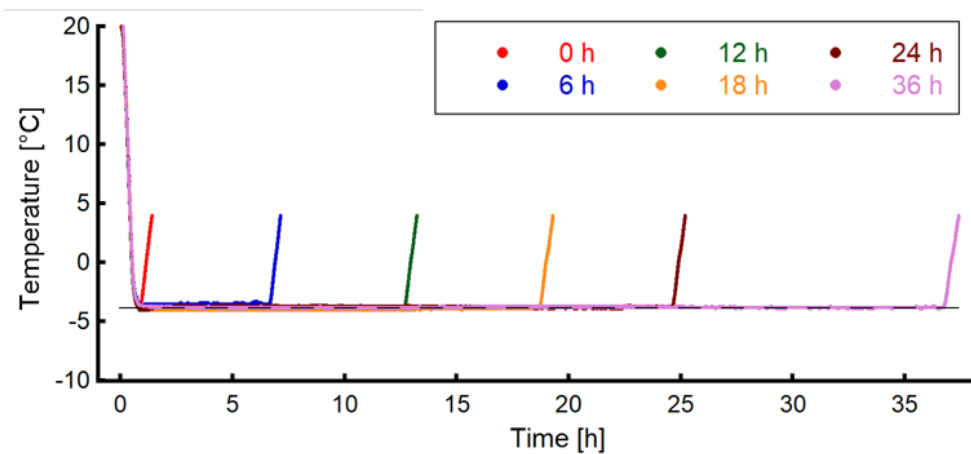

(a)

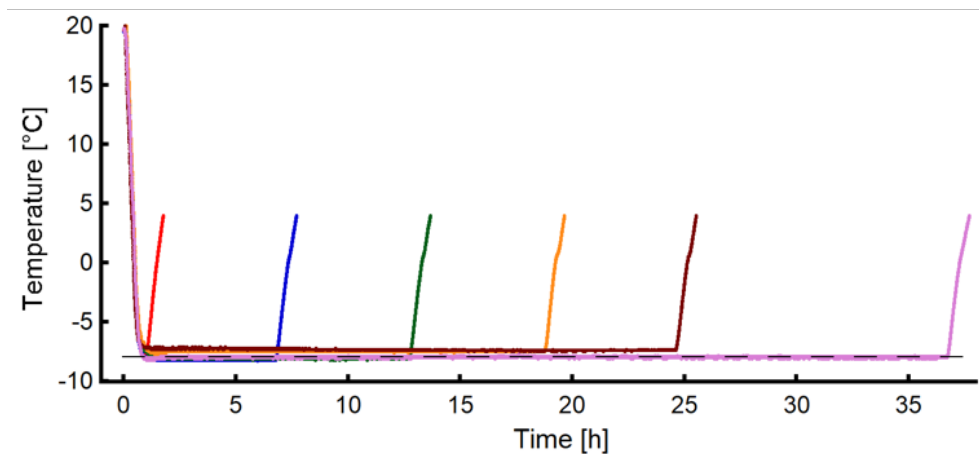

(b)

**Figure S1.** Time course of temperature during supercooling treatments at (a) -4 °C and (b) -8 °C . The temperature never increased to 0 °C during the supercooling treatment
